# Supplementary material for: The Iron Maiden. Cytosolic Aconitase/IRP1 Conformational Transition in the Regulation of Ferritin Translation and Iron Hemostasis
Source: MDPI journal article supplement (doi:10.3390/biom11091329), 2021-09-09
Supplement: s1 [file s1]

**Supplementary Information for:**

**The iron maiden. Cytosolic aconitase/IRP1 conformational transition in the regulation of ferritin translation and iron hemostasis**

Cécilia Hognon<sup>1</sup>, Emmanuelle Bignon<sup>1</sup>, Guillaume Harle<sup>2</sup>, Nadège Touche<sup>2</sup>, Stéphanie Grandemange<sup>2, \*</sup> and Antonio Monari<sup>1,3\*</sup>

<sup>1</sup>Université de Lorraine and CNRS, UMR 7019 LPCT, F-54000 Nancy, France

<sup>2</sup>Université de Lorraine and CNRS, UMR 7039 CRAN, F-54000 Nancy, France

<sup>3</sup>Université de Paris and CNRS, ITODYS, F-75006 Paris, France.

\*Correspondence: SG [stephanie.grandemange@univ-lorraine.fr](mailto:stephanie.grandemange@univ-lorraine.fr), AM [Antonio.monari@univ-lorraine.fr](mailto:Antonio.monari@univ-lorraine.fr)

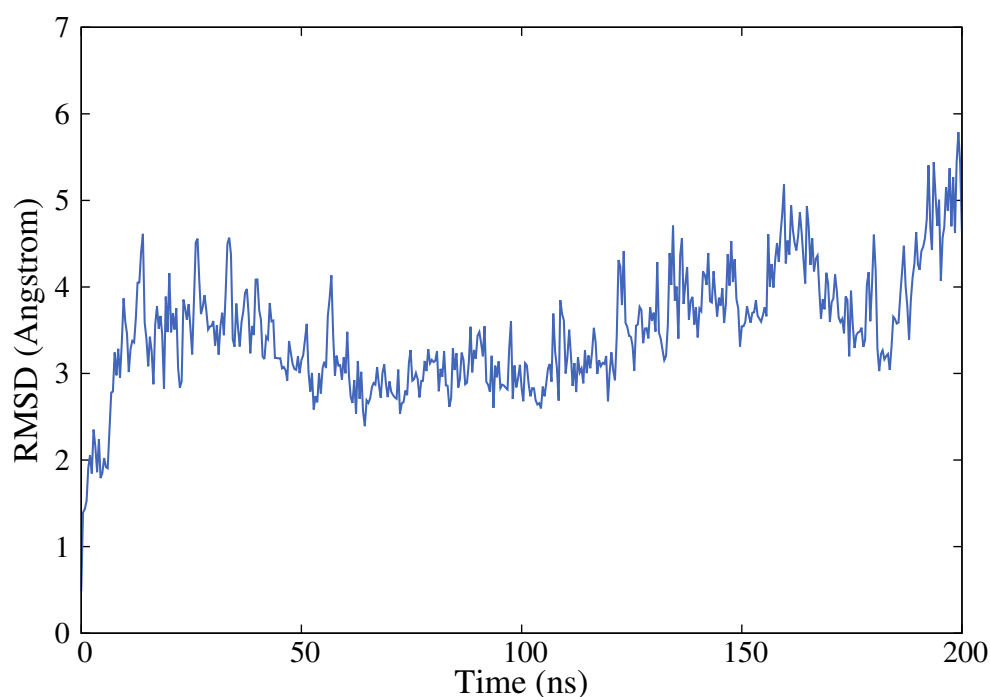

**Figure S1.** Time series of the RMSD for the isolated IRP1.

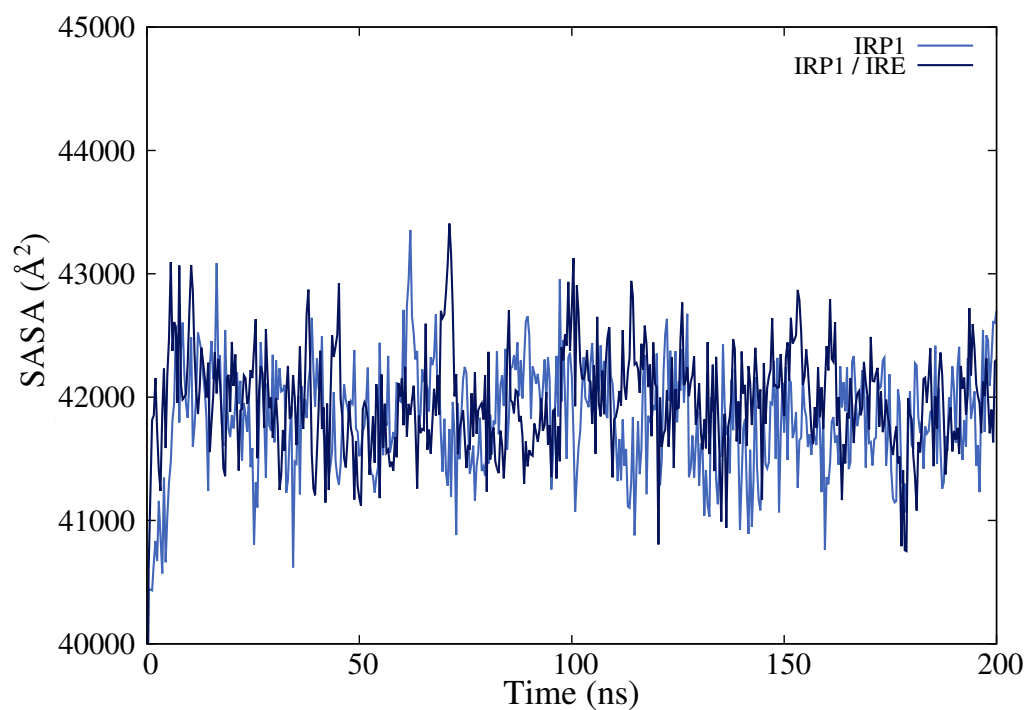

**Figure S2.** Time series of the Solvent Accessible Surface Area (SASA) for isolated IRP1 and the IRE/IRP1 complex.

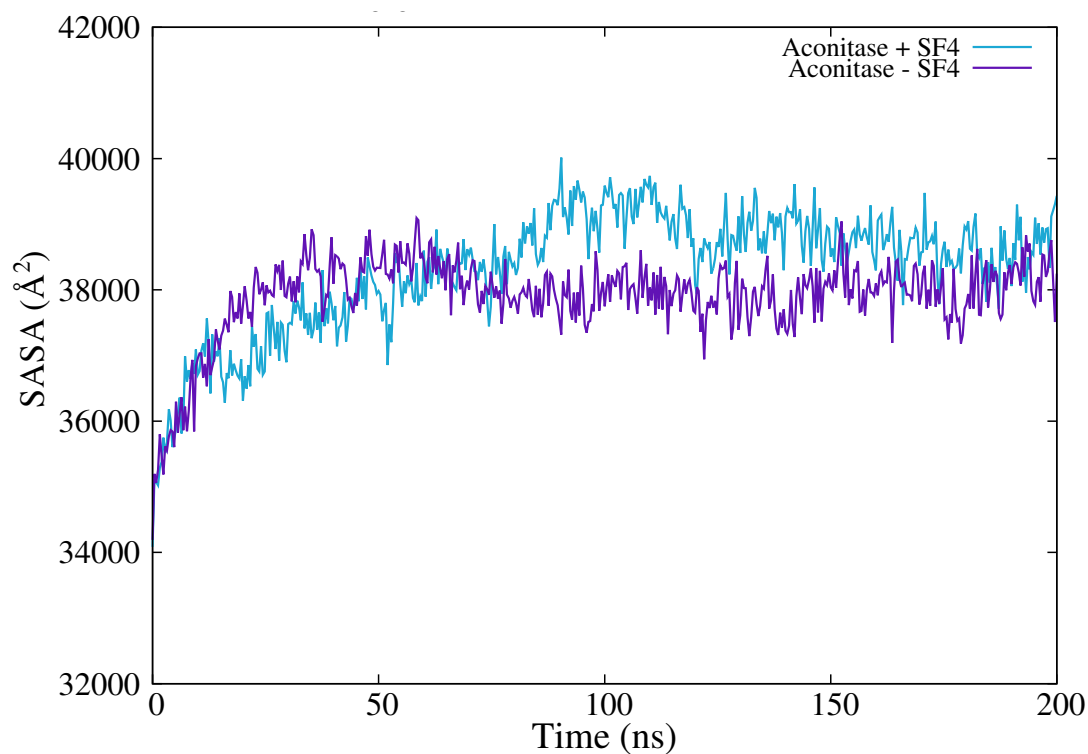

**Figure S3.** Time series of the Solvent Accessible Surface Area (SASA) for cAco with and without the inclusion of the Fe-S cluster.

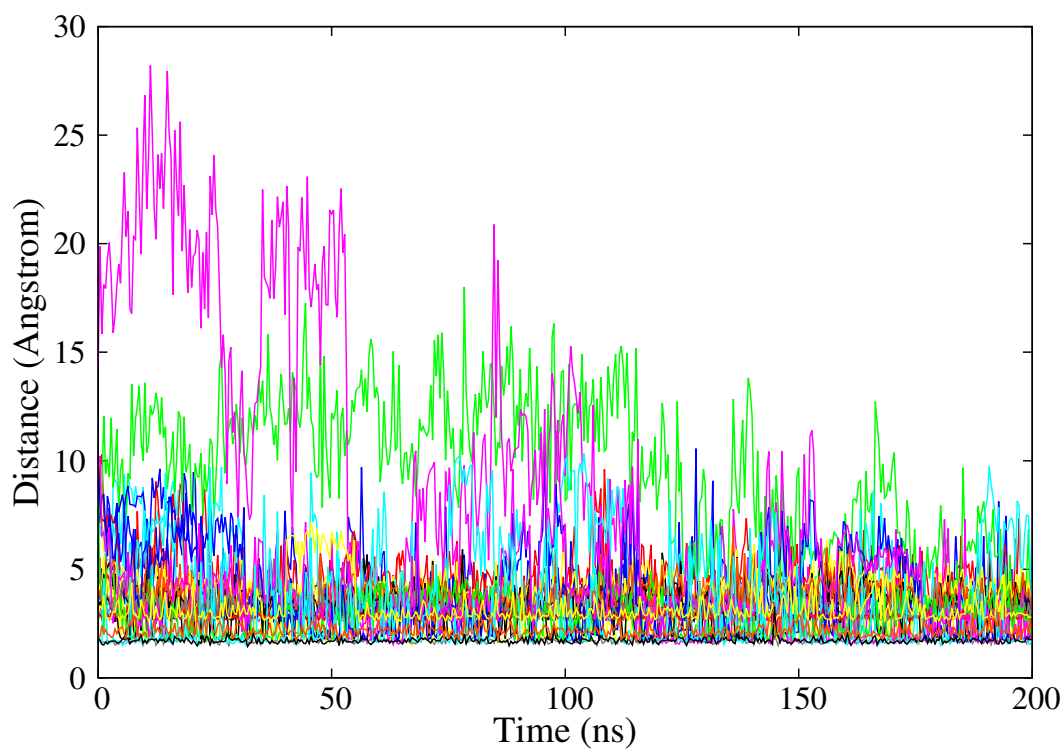

**Figure S4.** Time series of the distances between the interfacial residues of IRP1 and IRE.

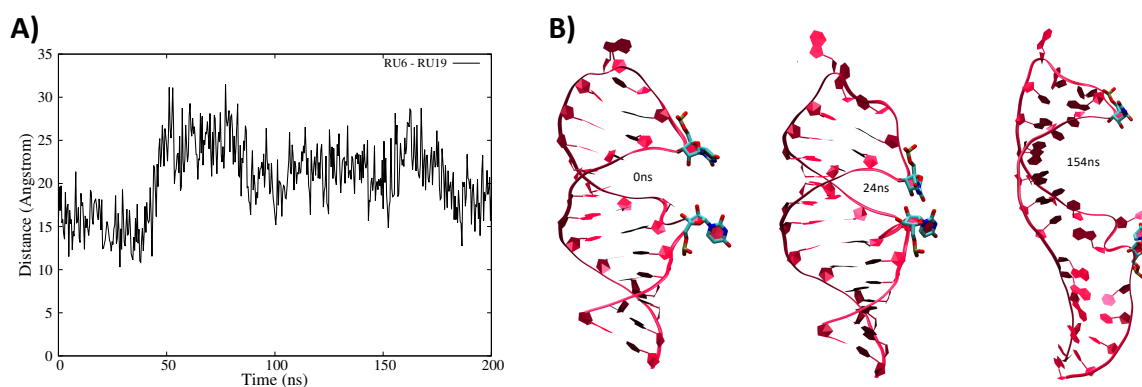

**Figure S5.** Time series of the distance between the center of mass of the two dangling uracil nucleobases (A) and representative snapshots extracted from the MD simulation (B).
